# Supplementary material for: Photoinduced electron-transfer processes in C60-tetrathiafulvalene dyads containing a short or long flexible spacer
Source: Royal Society of Chemistry journal article supplement (doi:10.1039/b206668h), 2002-01-01
Supplement: figure.pdf [file figure.pdf]

## Supporting information

### Photoinduced electron-transfer processes in C<sub>60</sub>- tetrathiafulvalene dyads containing a short or long flexible spacer

Emmanuel Allard,<sup>†</sup> Jack Cousseau,<sup>†\*</sup> Jesus Orduna,<sup>§</sup> Javier Garín,<sup>§</sup> Hongxia Luo,<sup>‡</sup> Yasuyuki Araki,<sup>‡</sup> and Osamu Ito<sup>†\*</sup>.

<sup>†</sup> *Laboratoire d'Ingénierie Moléculaire et Matériaux Organiques, UMR CNRS 6501, University of Angers, 2 Bd Lavoisier, 49045 Angers Cedex, France.*

<sup>§</sup> *Departamento de Química Orgánica, ICMA, Universidad de Zaragoza-CSIC, E-50009, Spain.*

<sup>‡</sup> *Institute of Multidisciplinary Research for Advanced Materials, Tohoku University, CREST (JST), Katahira, Aoba-ku, Sendai, 980-8577 Japan.*

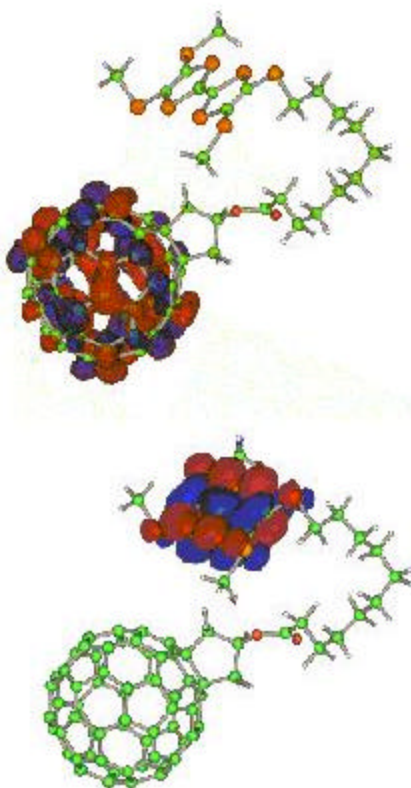

**Fig. S11.** PM3 calculated geometries and molecular orbitals for folded structure of dyad **B** ( $R_{cc} = 8 \text{ \AA}$ ); HOMO (lower MO) and LUMO (upper MO).
